# Supplementary material
Source: MDPI journal article supplement (https://www.mdpi.com/2306-5710/10/1/1)
Supplement: s1 [file s1]

## Supporting Material

### Insight into bioactive compounds, antioxidant and anti-diabetic properties of rosehip (*Rosa canina* L.)-based tisanes with addition of hibiscus flowers (*Hibiscus sabdariffa* L.) and saffron (*Crocus sativus* L.)

Dušan Vasić<sup>1,2</sup>, Jelena S. Katanić Stanković<sup>3</sup>, Tijana Urošević<sup>1</sup>, Maja Kozarski<sup>1</sup>, Nenad Naumovski<sup>4,7</sup>, Haroon Khan<sup>8</sup>, Jelena Popović-Djordjević<sup>1,\*</sup>

<sup>1</sup> University of Belgrade-Faculty of Agriculture, Department of Food Technology and Biochemistry, 11080 Belgrade, Serbia

<sup>2</sup> Ministry of Agriculture, Forestry and Water Management, 11070 Belgrade, Serbia

<sup>3</sup> University of Kragujevac, Institute for Information Technologies Kragujevac, Department of Science, 34000 Kragujevac, Serbia

<sup>4</sup> University of Canberra, Faculty of Health, School of Rehabilitation and Exercise Sciences, Canberra, 2601, ACT, Australia

<sup>5</sup> Functional Foods and Nutrition Research (FFNR) Laboratory, University of Canberra, Ngunnawal Country, 2617, ACT, Australia

<sup>6</sup> University of Canberra Research Institute for Sport and Exercise (UCRISE), University of Canberra, Canberra, ACT, 2601, Australia

<sup>7</sup> Harokopio University, Department of Nutrition and Dietetics, Kallithea, Attica, 17671, Greece

<sup>8</sup> Department of Pharmacy, Abdul Wali Khan University Mardan, Mardan 23200, Pakistan

\*Correspondence: Jelena Popović-Djordjević; [jelenadj@agrif.bg.ac.rs](mailto:jelenadj@agrif.bg.ac.rs)

#### Table of contents

---

#### Supplementary 1. Experimental installation and procedure

**Figure S1.** Schematic presentation of the experimental dryer.

**Figure S2.** Dimensionless moisture ratio depending on the drying time for rosehip samples at an airflow velocity of 2 m/s and drying temperatures of 40, 50 and 60 °C.

**Figure S3.** Tisane samples.

**Figure S4.** The content of polyphenols and antioxidant activity in rosehip-based tisanes: A) TPC—total phenolic content, B) TFC—total flavonoid content, C) TFIC—total flavonol content, and D) TAC—total anthocyanin content; E) DPPH<sup>•</sup> scavenging activity, and F) ABTS<sup>•+</sup> scavenging activity; dry weight (dw) of plant parts; R—rosehip, R/H—rosehip/hibiscus mixture, and R/H/S—rosehip/hibiscus/saffron mixture (40, 50, 60 °C—drying temperatures of rosehip).

---

## 1. Experimental installation and procedure

The experimental installation used for the purpose of the experiment (Figure S1) was constructed to be able to precisely measure the mass change in time, and hold the set temperatures and air velocity. Fresh air is pushed by a fan through the electric heater. Heated air flows over the material, and the temperature of the air is regulated by a thermoregulator. A digital PID thermoregulator (REX C400, Japan) with an accuracy of  $\pm 0.1$  °C is connected to the electric heater and is used to control and measure the air temperature. Hot air heats the material and absorbs moisture from the surface of the material. The installation also contains thermocouples (accuracy  $\pm 0.1$  °C), that are placed in front of the material being dried, before the heated air reaches it. After the process is completed, the exhaust air is released into the atmosphere. The speed of the air flow was measured by a hotwire thermoanemometer VT115S, with an accuracy of 0.01 m/s. The fresh rosehips were placed on the sheet metal plate. In intervals of 10 min, the heating plate was placed on the balance and measure the mass change in time. The balance used is a Kern precision balance, from Germany, with an accuracy of  $\pm 0.01$  g.

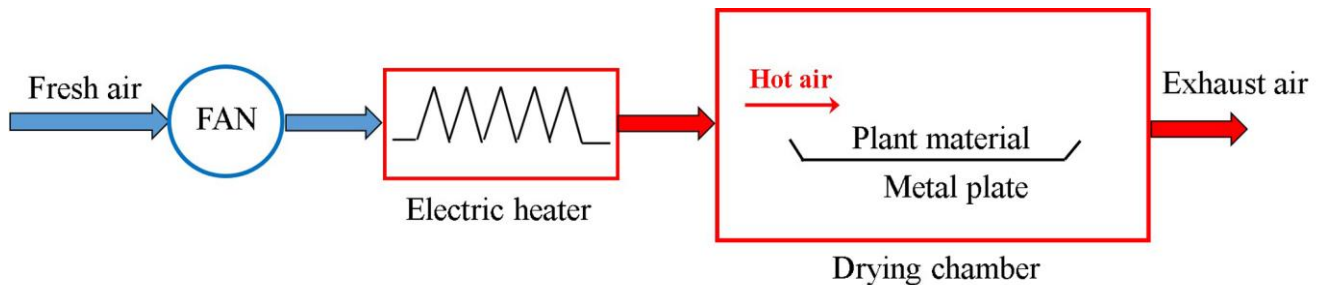

**Figure S1.** Schematic presentation of the experimental dryer.

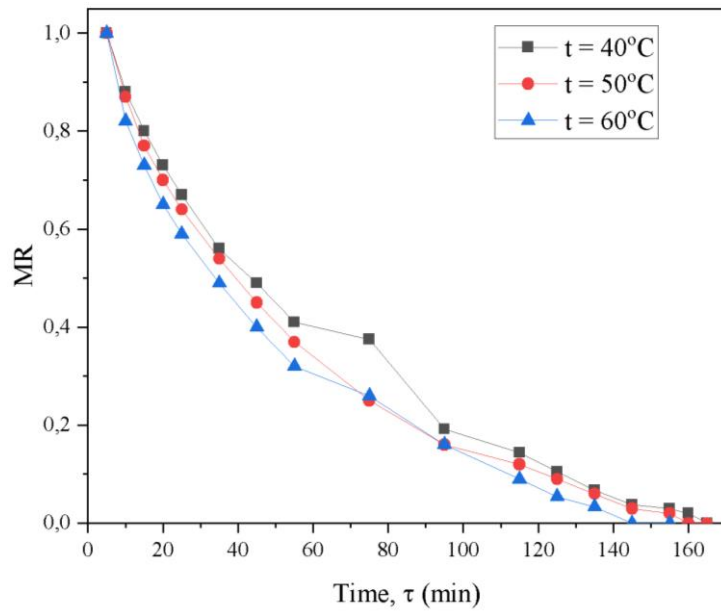

**Figure S2.** Dimensionless moisture ratio depending on the drying time for rosehip samples at an airflow velocity of 2 m/s and drying temperatures of 40, 50 and 60 °C.

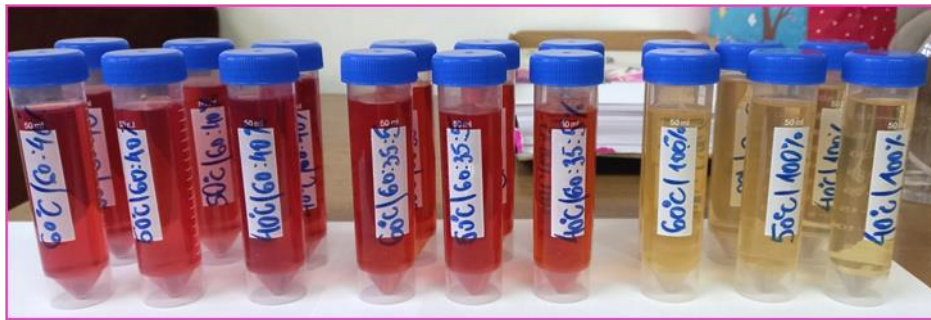

**Figure S3.** Tisane samples.

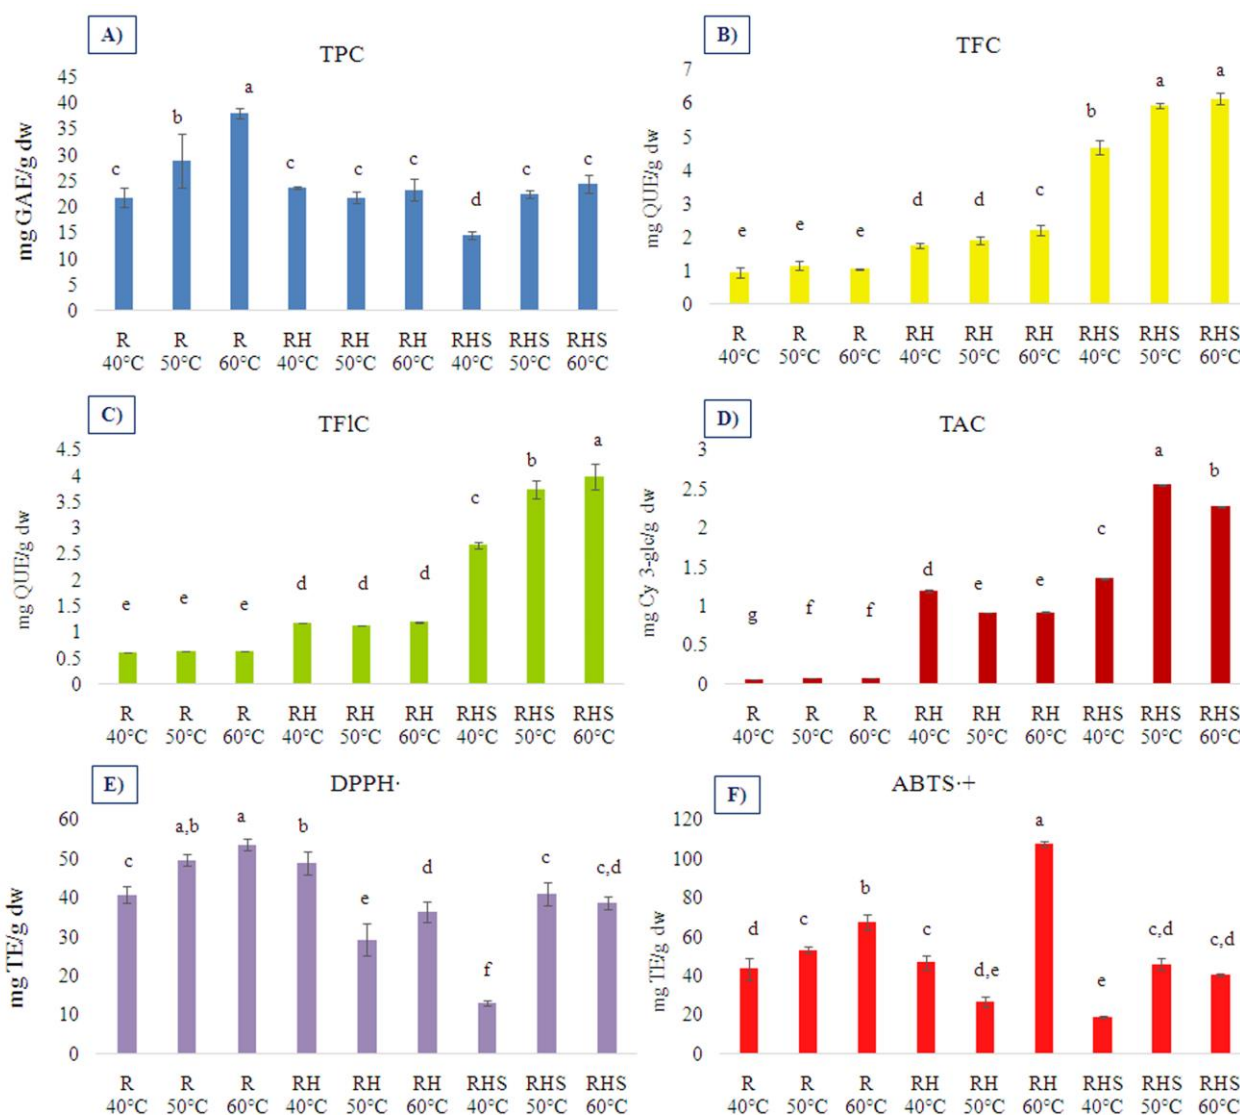

**Figure S4.** The content of polyphenols and antioxidant activity in rosehip-based tisanes: A) TPC—total phenolic content, B) TFC—total flavonoid content, C) TFIC—total flavonol content, and D) TAC—total anthocyanin content; E) DPPH· scavenging activity, and F) ABTS<sup>+</sup> scavenging activity; dry weight (dw) of plant parts; R—rosehip, R/H—rosehip/hibiscus mixture, R/H/S—rosehip/hibiscus/saffron mixture (40, 50, 60 °C—drying temperatures of rosehip).

GAE—gallic acid equivalents; QUE—quercetin equivalents; Cy 3-glc—cyanidin-3-glycoside equivalents; TE—Trolox equivalents; DPPH· - 2,2-diphenyl-1-picrylhydrazyl; ABTS - 2,2'-azino-bis(3-ethylbenzothiazoline-6-sulphonic acid).

The values are the means  $\pm$  SD ( $n \geq 3$ ); different letters (a-g) mean a significant difference at  $p < 0.05$ .

In one-way ANOVA analysis with Fisher LSD test, in each additive dependent group of samples separately, all samples were compared mutually.
